# Supplementary material for: Sharing N atoms boosting Z-scheme charge transfer in SrTiO2N/CNx heterojunctions for selective photoreduction of CO2 to CH4
Source: Royal Society of Chemistry journal article supplement (doi:10.1039/d4dt02037e), 2024-01-01
Supplement: d4dt02037e1.pdf [file d4dt02037e1.pdf]

## Revised supplementary information

Sharing N atoms boosting Z-scheme charge transfer in SrTiO<sub>2</sub>N/CN<sub>x</sub>  
heterojunctions for selective photoreduction CO<sub>2</sub> to CH<sub>4</sub>

*Qing-shan Wang*<sup>a</sup>, *Yi-chao Yuan*<sup>a, \*</sup>, *Wei-guo Pan*<sup>b, c, \*</sup>, *Rui-tang Guo*<sup>b, c, \*</sup>

a School of Energy and Power Engineering, University of Shanghai for Science and  
Technology, 200093 Shanghai, China

b College of Energy and Mechanical Engineering, Shanghai University of Electric  
Power, 200090 Shanghai, China

c Shanghai Institute of Pollution Control and Ecological Security, 200092 Shanghai,  
China

**Corresponding author1:** Yi-chao Yuan

**Email:** ychyuan@163.com

**Corresponding author2:** Wei-guo Pan

**Email:** pweiguo@163.com

**Corresponding author3:** Rui-tang Guo

**Email:** grta@sohu.com

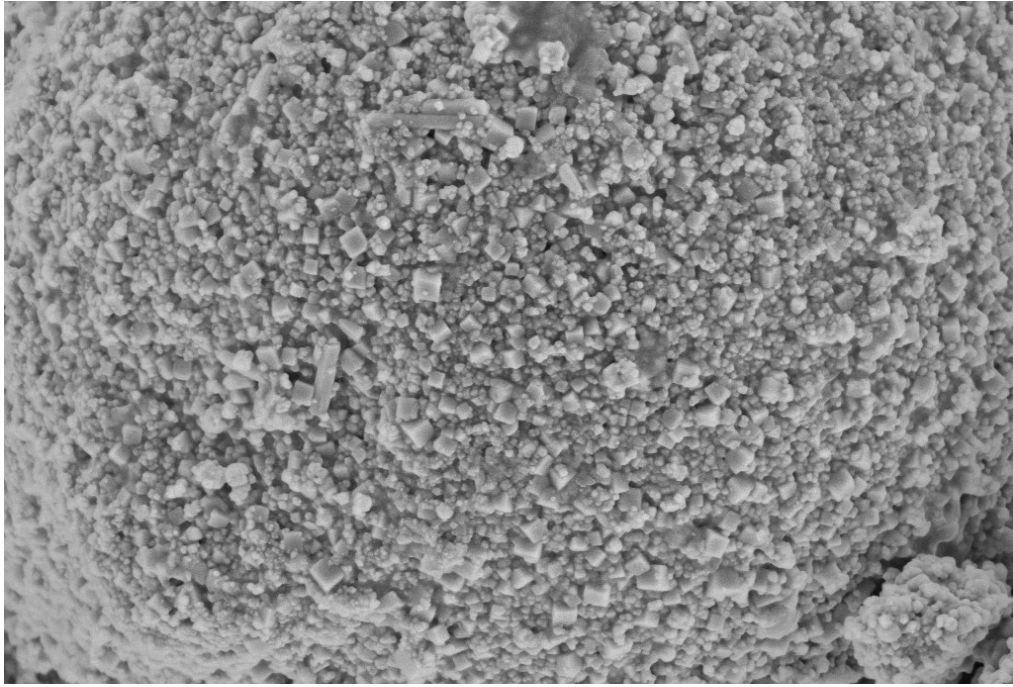

**Fig. S1** SEM of SrTiO<sub>3</sub>

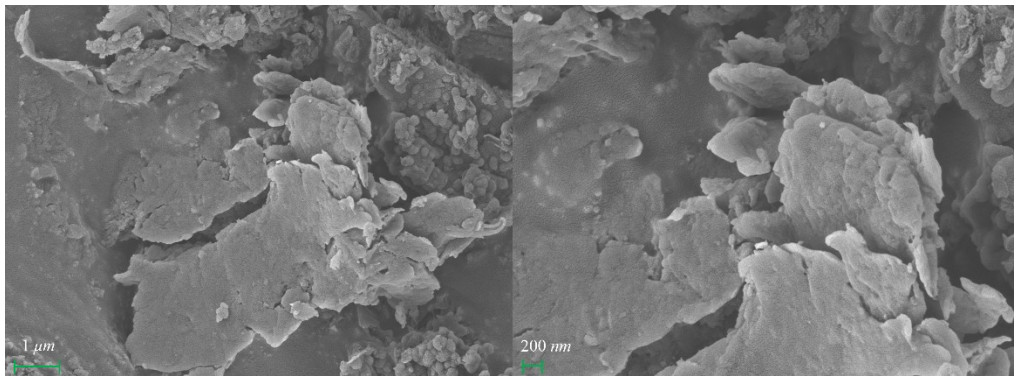

**Fig. S2** SEM of CN

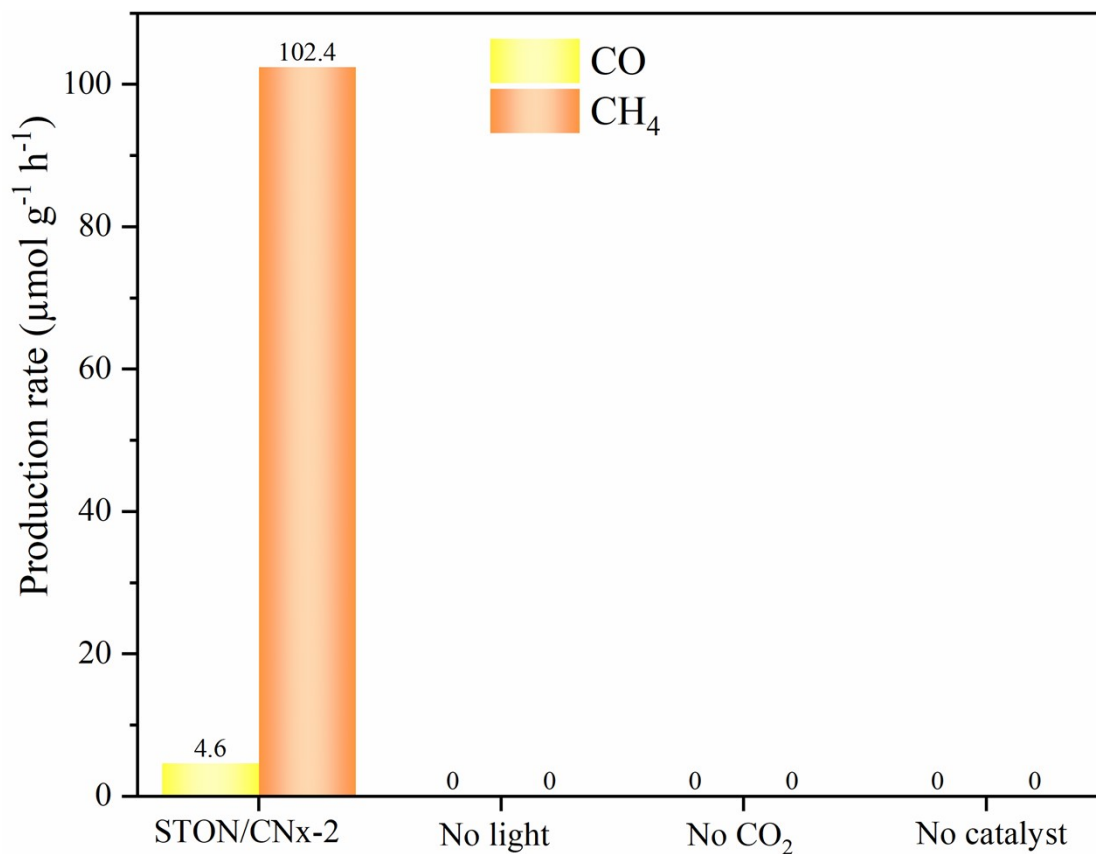

Fig. S3 CO<sub>2</sub> photoreduction activities of STON/CNx-2 in various conditions

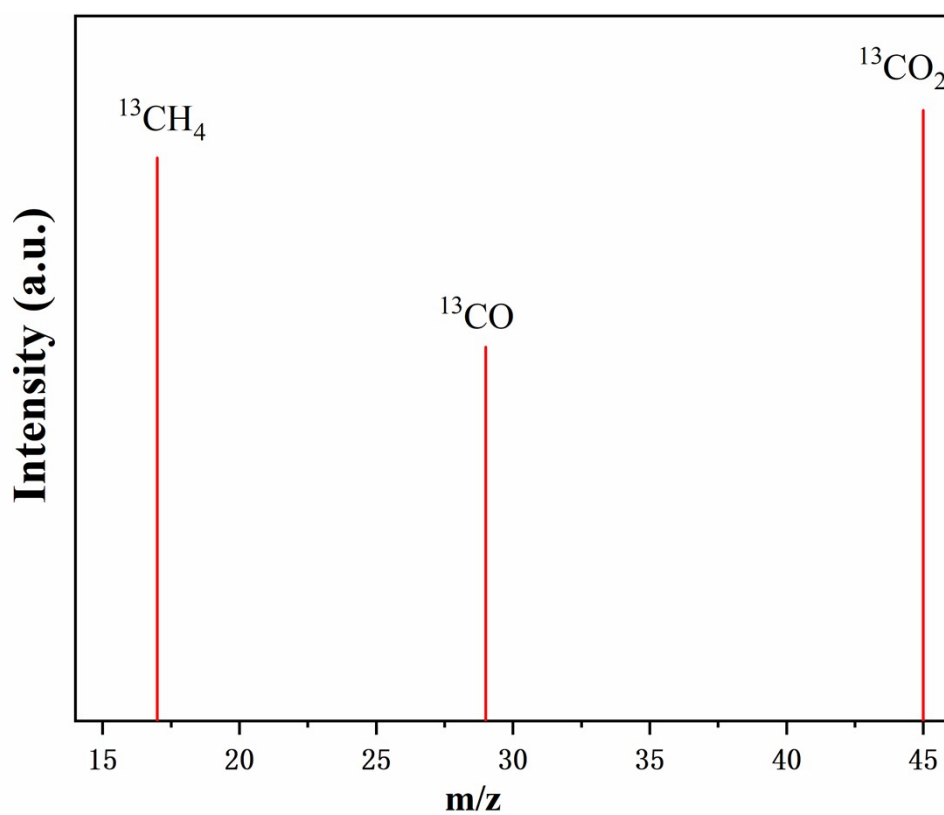

Fig. S4 Gas chromatography-mass spectrometry (GC-MS) of the products.

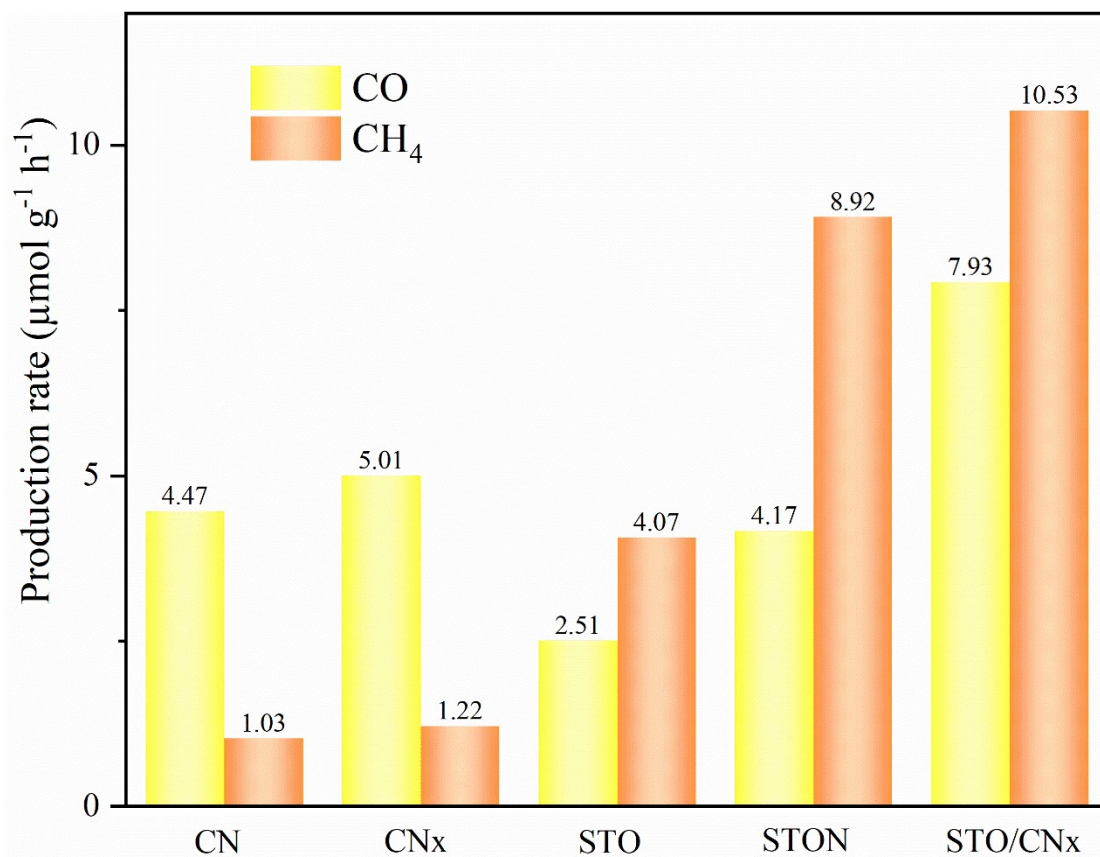

**Fig. S5** Photocatalytic CO<sub>2</sub> reduction performance for prepared catalysts in 1% TEOA solution with 300 W Xe lamp.

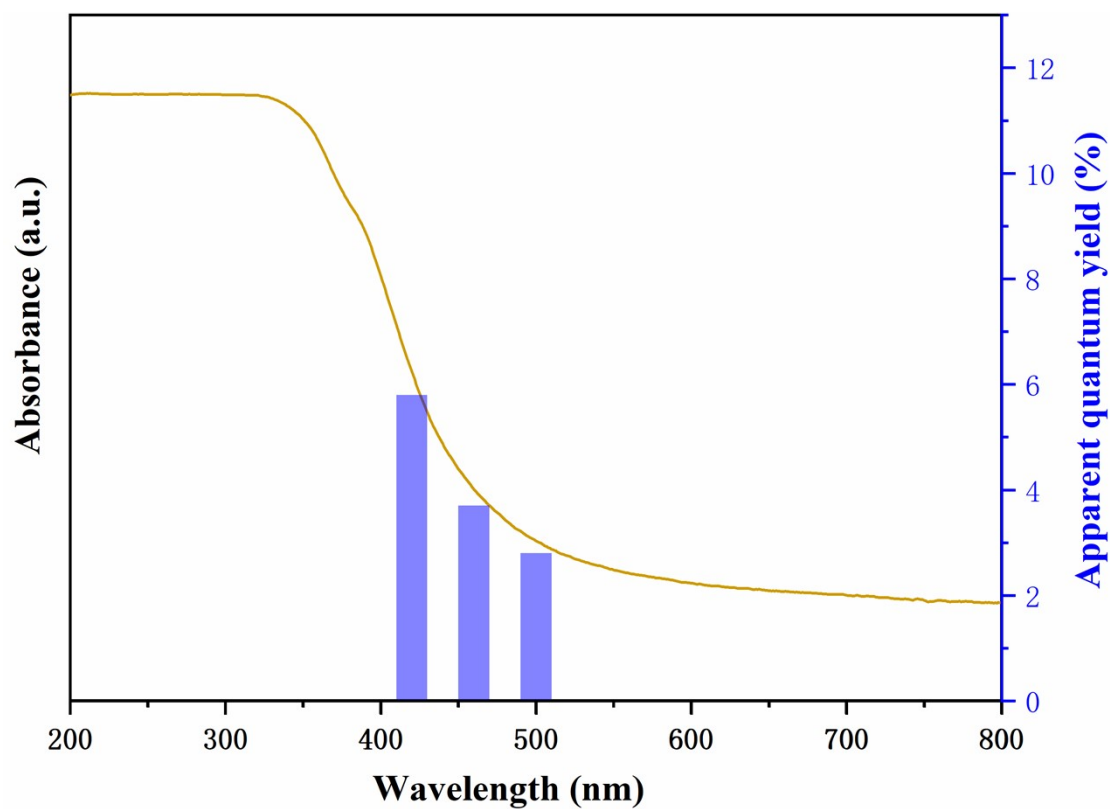

**Fig. S6** AQY of the STON/CNx-2 at different wavelengths.

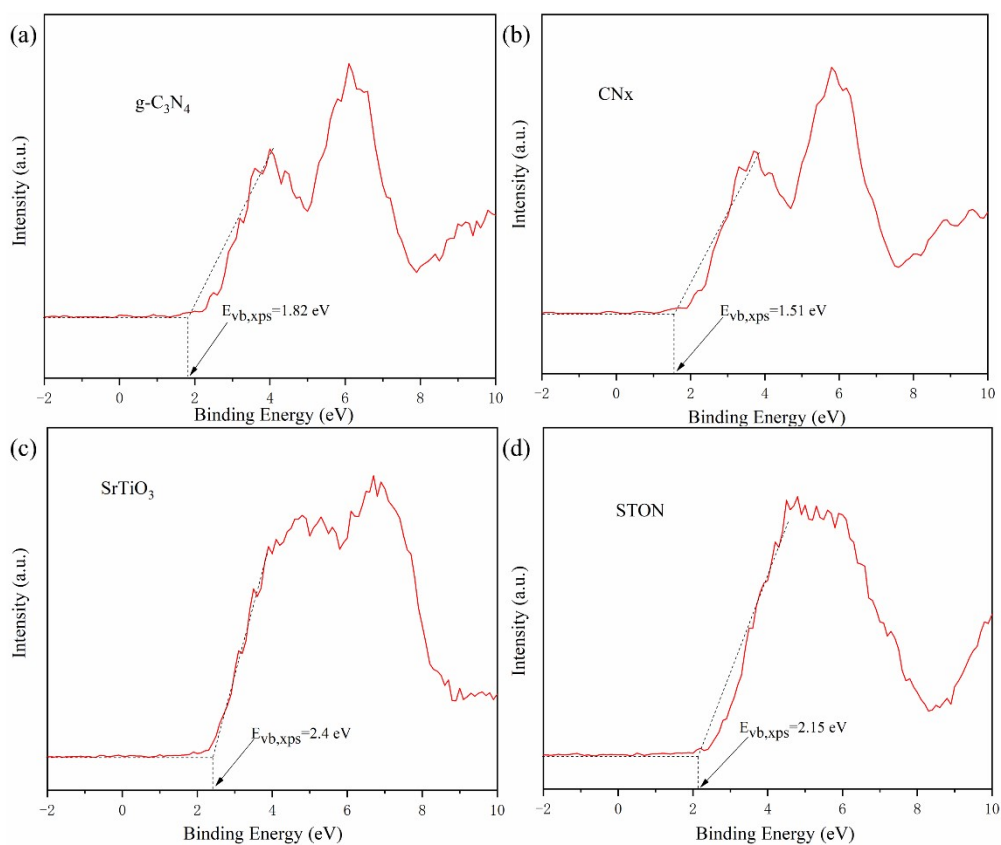

**Fig. S7** Valence band energy of CN, CN<sub>x</sub>, STO, and STON.

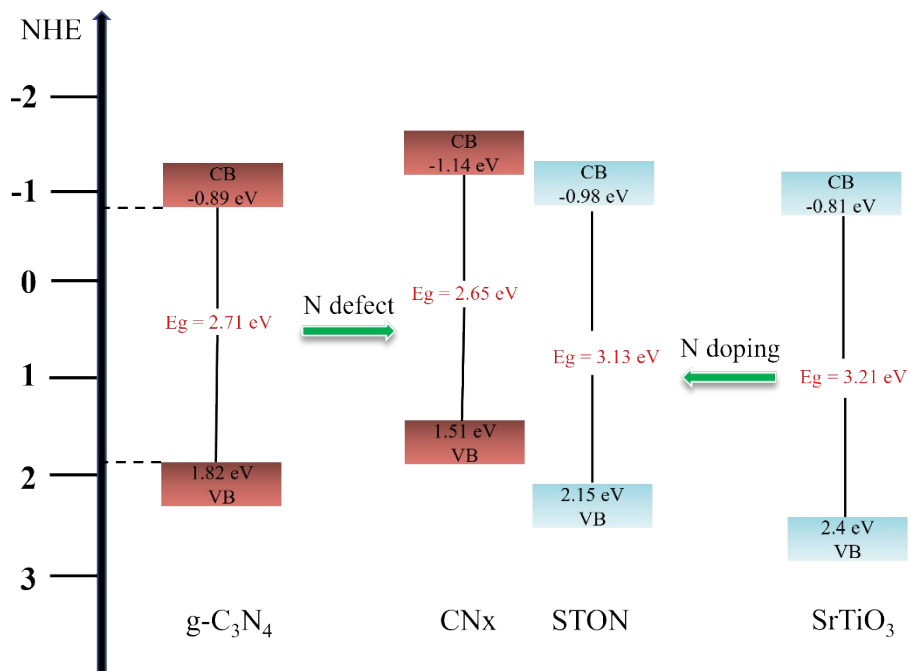

**Fig. S8** The energy band structures of CN, CN<sub>x</sub>, STO, and STON.

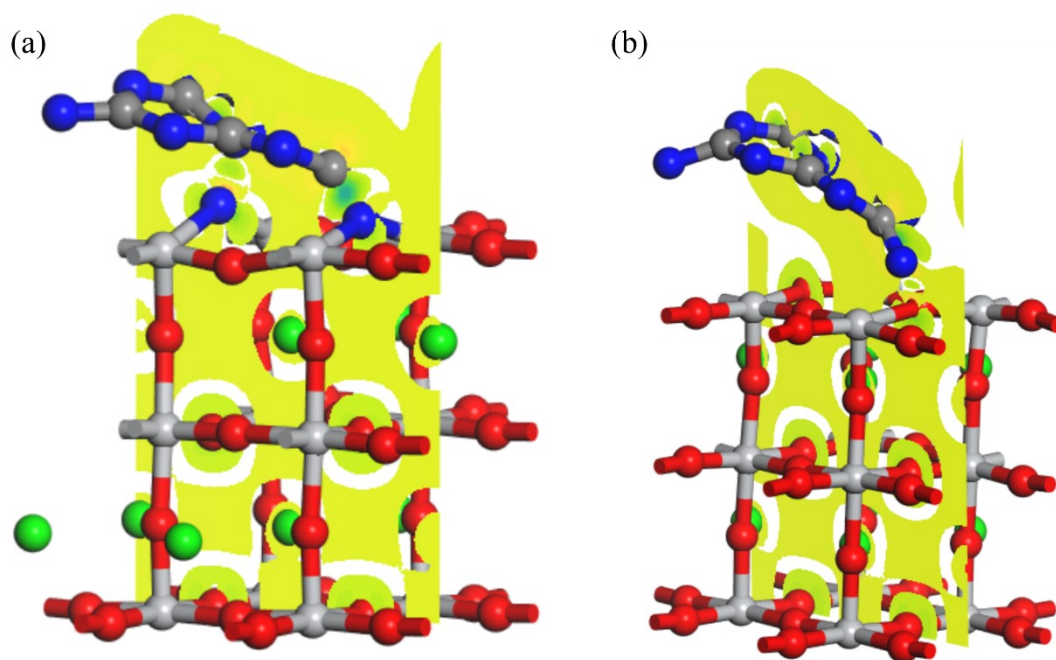

**Fig. S9** The charge density distributions on the cut layers of STO/CNx (a) and STON/CNx (b).

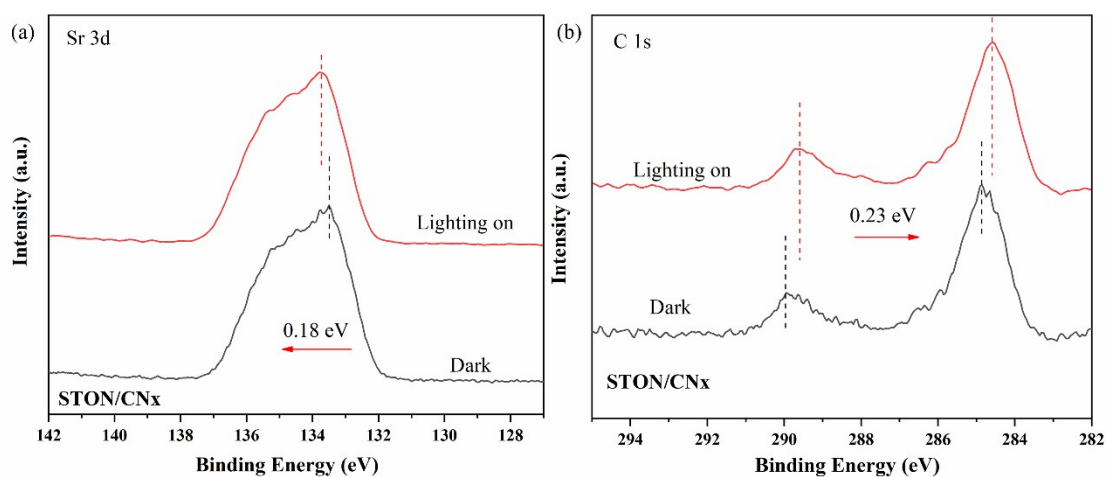

**Fig. S10** (a) Sr 3d and (b) C 1s XPS spectra of STON/CNx with and without irradiation.
